# Supplementary material for: Fabrication of nylon-6/POMs nanofibrous membranes and the degradation of mustard stimulant research
Source: Royal Society of Chemistry journal article supplement (doi:10.1039/c4ra06800a), 2014-01-01
Supplement: c4ra06800a1.pdf [file c4ra06800a1.pdf]

---

Electronic Supplementary Information for

## **Fabrication of Nylon-6/POMs nanofibrous membranes and the degradation mustard stimulant research**

Feng Liu,<sup>a</sup> Qifang Lu,<sup>b</sup> Xiuling Jiao,<sup>a,\*</sup> Dairong Chen,<sup>a,\*</sup>

<sup>a</sup>School of Chemistry & Chemical Engineering, National Engineering Research Center for Colloidal Materials, Shandong University, Jinan 250100, P. R. China.

<sup>b</sup>Shandong Provincial Key Laboratory of Processing and Testing Technology of Glass & Functional Ceramics, Qilu University of Technology, Jinan 250353, P. R. China.

**Table S1** GC-MS for standard curve

| Number                               | 0 | 1        | 2         | 3         | 4         | 5         |
|--------------------------------------|---|----------|-----------|-----------|-----------|-----------|
| HD standard solution (mL)            | 0 | 0.1      | 0.2       | 0.5       | 0.8       | 1         |
| CH <sub>2</sub> Cl <sub>2</sub> (mL) | 1 | 0.9      | 0.8       | 0.5       | 0.2       | 0         |
| HD absolute content (μL)             | 0 | 0.1      | 0.2       | 0.5       | 0.8       | 1         |
| Peak area                            | 0 | 56457071 | 100660720 | 198493978 | 321187005 | 382276345 |

---

\* Corresponding author. E-mail address: [jiaoxl@sdu.edu.cn](mailto:jiaoxl@sdu.edu.cn). Tel: +86-531-88364280. Fax: +86-531-88364280.
